# Supplementary material
Source: PubMed Central journal article supplement (PMC3501718)
Supplement: supp_blood-2012-01-402545_blood-2012-01-402545-1.pdf [file supp_blood-2012-01-402545_blood-2012-01-402545-1.pdf]

| Patient | Age/<br>Gender | Induction Regimen                     | Consolidation Regimen   | Salvage Regimen                       |
|---------|----------------|---------------------------------------|-------------------------|---------------------------------------|
| 1       | 32M            | Cytarabine/Daunorubicin               | N/A (refractory)        | Idarubicin/Fludarabine/<br>Cytarabine |
| 2       | 70F            | Cytarabine/Mitoxantrone               | N/A (refractory)        | N/A                                   |
| 3       | 29F            | Cytarabine/Daunorubicin/Etoposide     | Allogeneic Transplant   | N/A                                   |
| 4       | 68M            | Cytarabine/Mitoxantrone               | Cytarabine/Mitoxantrone | N/A                                   |
| 5       | 55M            | Cytarabine/Daunorubicin               | N/A (refractory)        | Idarubicin/Fludarabine/<br>Cytarabine |
| 6       | 23F            | Cytarabine/Dauno/Etoposide            | N/A (refractory)        | Mitoxantrone/<br>Etoposide/Cytarabine |
| 7       | 61M            | Cytarabine/Daunorubicin/Etoposide     | N/A (refractory)        | Carboplatin/Topotecan                 |
| 8       | 72M            | Cytarabine/Mitoxantrone               | High dose Cytarabine    | N/A                                   |
| 9       | 54F            | Mitoxantrone/<br>Etoposide/Cytarabine | High dose Cytarabine    | Clofarabine                           |
| 10      | 64F            | Cytarabine/Daunorubicin               | N/A (refractory)        | High dose Cytarabine                  |
| 11      | 56M            | Cytarabine/Daunorubicin               | N/A (refractory)        | High dose Cytarabine                  |
| 12      | 33F            | Cytarabine/Daunorubicin               | High dose Cytarabine    | Cytarabine/Clofarabine                |
| 13      | 62F            | Cytarabine/Daunorubicin               | N/A (refractory)        | Mitoxantrone/<br>Etoposide/Cytarabine |
| 14      | 66F            | Cytarabine/Daunorubicin               | N/A (refractory)        | N/A                                   |

**Supplemental Table 1.** Summary of conventional treatments received prior to enrollment on quizartinib study. Cytarabine was administered by continuous infusion during induction. All 14 patients in this series had normal diploid cytogenetics at diagnosis.
